## Detection of new *Mycobacterium leprae* subtype in Bangladesh by genomic characterization to explore transmission patterns

Maria Tió-Coma<sup>1</sup>, Charlotte Avanzi<sup>2§</sup>, Els M. Verhard<sup>1</sup>, Louise Pierneef<sup>1</sup>, Anouk van Hooij<sup>1</sup>,  
Andrej Benjak<sup>2§</sup>, Johan Chandra Roy<sup>3</sup>, Marufa Khatun<sup>3</sup>, Khorshed Alam<sup>3</sup>, Paul Corstjens<sup>4</sup>,  
Stewart T. Cole<sup>2,5</sup>, Jan Hendrik Richardus<sup>6</sup>, and Annemieke Geluk<sup>1\*</sup>

From the <sup>1</sup>Department of Infectious Diseases, Leiden University Medical Center, Leiden, The Netherlands; <sup>2</sup>Global Health Institute, Ecole Polytechnique Fédérale de Lausanne, Lausanne, Switzerland; <sup>3</sup>Rural Health Program, The Leprosy Mission International Bangladesh, Nilphamari, Bangladesh; <sup>4</sup>Department of Cell and Chemical Biology, Leiden University Medical Center, Leiden, The Netherlands; <sup>5</sup>Institut Pasteur, Paris, France; <sup>6</sup>Department of Public Health, Erasmus MC, University Medical Center Rotterdam, Rotterdam, The Netherlands.

<sup>§</sup> **Current laboratory:** *Mycobacteria Research Laboratories, Colorado State University, Fort Collins, CO, USA (Charlotte Avanzi); Department for BioMedical Research, University of Bern, Bern, Switzerland (Andrej Benjak).*

**RUNNING TITLE:** *M. leprae* genotypes in Bangladesh

**KEYWORDS:** diagnosis; genotypes; strain subtype; WGS; leprosy; *M. leprae*; RLEP  
PCR; transmission

**\*Corresponding author**

E-mail: [a.geluk@lumc.nl](mailto:a.geluk@lumc.nl) Tel: +31-71-526-1974; Fax +31-71-526-6758;

## 1 **Abstract**

2 *Mycobacterium leprae*, the causative agent of leprosy, is an unculturable bacterium with a considerably  
3 reduced genome (3.27 Mb) compared to homologues mycobacteria from the same ancestry. *M. leprae*  
4 transmission is suggested to occur through aerosols but the exact mechanisms of infection remains  
5 unclear. In 2001, the genome of *M. leprae* was first described and subsequently four genotypes (1-4)  
6 and 16 subtypes (A-P) were identified providing means to study global transmission patterns for  
7 leprosy.

8 We investigated *M. leprae* carriage as well as infection in leprosy patients (n=60) and healthy  
9 household contacts (HHC; n=250) from Bangladesh using molecular detection of the bacterial element  
10 RLEP in nasal swabs (NS) and slit skin smears (SSS). In parallel, we explored bacterial strain diversity  
11 by whole-genome sequencing (WGS) and Sanger sequencing.

12 In the studied cohort in Bangladesh, *M. leprae* DNA was detected in 33.3% of NS and 22.2% of SSS of  
13 patients with bacillary index of 0 whilst in HHC 18.0% of NS and 12.3% of SSS were positive.

14 The majority of the *M. leprae* strains detected in this study belonged to genotype 1D (55%), followed  
15 by 1A (31%). Importantly, WGS allowed the identification of a new *M. leprae* genotype, designated  
16 1B-Bangladesh (14%), which clustered separately between the 1A and 1B strains. Moreover, we  
17 established that the genotype previously designated 1C, is not an independent subtype but clusters  
18 within the 1D genotype.

19 Intraindividual differences were present between the *M. leprae* strains obtained including mutations in  
20 hypermutated genes, suggesting mixed colonization/infection or in-host evolution.

21 In summary, we observed that *M. leprae* is present in asymptomatic contacts of leprosy patients fueling  
22 the concept that these individuals contribute to the current intensity of transmission. Our data therefore  
23 emphasize the importance of sensitive and specific tools allowing post-exposure prophylaxis targeted at  
24 *M. leprae*-infected or -colonized individuals.

## 1 **Author summary**

2 Leprosy, an ancient infectious disease that still represents a threat in several low- and middle-income  
3 countries is caused by *Mycobacterium leprae*. Despite the availability of efficient drug treatment, the  
4 number of new cases has been virtually stable in the last decade. Transmission of the bacteria is not  
5 completely understood, but aerosols have been suggested as the most common route of dissemination.  
6 In this study conducted in Bangladesh, we investigated transmission of *M. leprae* in patients and their  
7 household contacts using molecular, genomic and serological approaches. We identified household  
8 contacts who did not show clinical symptoms of leprosy but were infected with or carried the pathogen  
9 in their nasal cavities; these individuals may contribute, unknowingly, to the continued spread of *M.*  
10 *leprae*. Additionally, we studied the diversity of *M. leprae* strains from nasal swabs and slit skin smears  
11 by whole genome sequencing. This led to the first identification of an *M. leprae* genotype thus far only  
12 present in Bangladesh.

13 The results of this study allowed us to detect transmission patterns in North west Bangladesh.  
14 Moreover, our data emphasize the importance of providing post-exposure prophylaxis to asymptomatic  
15 individuals carrying *M. leprae* to reduce transmission and decrease the number of new leprosy cases.

## 1 Introduction

2 *Mycobacterium leprae* and the more recently discovered *Mycobacterium lepromatosis* (1) are the  
3 causative agents of leprosy in humans as well as animals (2-7). Leprosy is a complex infectious  
4 disease often resulting in severe, life-long disabilities and still poses a serious health threat in low-  
5 and middle income countries (8). Despite the very limited *M. leprae* genome variability (9), the  
6 disease presents with characteristically different clinico-pathological forms (10) due to genetically  
7 dependent differences in the immune response to the pathogen, resulting in the WHO classification  
8 from paucibacillary (PB) to multibacillary (MB) leprosy (11). Notwithstanding the efficacy of  
9 multidrug therapy (MDT), approximately 210,000 new cases are still annually diagnosed and this  
10 incidence rate has been stable over the last decade (8). Aerosol transmission via respiratory routes is  
11 generally assumed to be the most probable way of bacterial dissemination (12, 13). Besides bacterial  
12 exposure other risk factors have been shown to be associated with development of leprosy such as  
13 genetic polymorphisms (14-17), the clinical type of the leprosy index case within a household,  
14 immunosuppression (18), and nutritional factors (19).

15  
16 *M. leprae* is closely related to *Mycobacterium tuberculosis*, however, its genome has undergone a  
17 reductive evolution resulting in a genome of only 3.27 Mb compared to the 4.41 Mb of *M.*  
18 *tuberculosis*' (20). Part of the genes lost in *M. leprae* included vital metabolic activity, causing it to be  
19 an obligate intracellular pathogen which cannot be cultured in axenic media that requires support of a  
20 host to survive. This poses major limitations to obtain sufficient bacterial DNA for research purposes  
21 including whole genome sequencing (WGS). Nevertheless, in 2001 the genome of *M. leprae* was first  
22 published (20) leading to the classification of *M. leprae* into four main genotypes (1-4) (21) and  
23 subsequently further allocation into 16 subtypes (A-P) (3, 22). The genome of *M. leprae* contains  
24 several repetitive elements such as RLEP which present 37 copies and has been widely applied in  
25 molecular diagnostics to specifically detect the presence of this mycobacterium (23-26).

*M. leprae* genotypes in Bangladesh

1 Single-nucleotide polymorphisms (SNP) genotyping and WGS are powerful approaches to investigate  
2 pathogen transmission as well as bacterial dissemination and evolution through genome  
3 characterization (21, 22, 27). The limited variation observed in the *M. leprae* genome permits the  
4 reconstruction of historic human migration patterns and the origin of *M. leprae* (28). Over the years,  
5 several studies have contributed to the detection and characterization of *M. leprae* genomes  
6 originating from patients all around the world (21, 22, 29) as well as from ancient skeletons (30-34),  
7 red squirrels (2, 7, 35), armadillos (3, 4), non-human primates (5) and soil (36-42). Moreover,  
8 skeleton remains have been successfully applied to retrospectively assess whether individuals who  
9 contributed to the care of leprosy patients such as the priest Petrus Donders, had developed leprosy  
10 (43). In the last few years, new tools were developed allowing direct sequencing of *M. leprae* from  
11 various types of clinical isolates (2, 29, 31). However, these methods were never applied on  
12 challenging samples such as slit skin smears (SSS) and nasal swabs (NS) containing a low amount of  
13 bacterial DNA compared to skin lesions of patients.

14

15 Household contacts of leprosy patients are a high risk group for developing the disease (44), and  
16 might serve as asymptomatic carriers contributing to bacterial dissemination. PCR and quantitative  
17 PCR (qPCR) are reliable techniques to detect *M. leprae* DNA and have been proposed as tools for  
18 early diagnosis of leprosy, particularly among household contacts of newly diagnosed patients (45,  
19 46). In Brazil, *M. leprae* DNA has been detected in 15.9% of healthy household contacts (HHC) in  
20 SSS, 9.7% in blood (45) and 8.9 to 49.0% in NS (12, 47, 48). Other studies from India, Indonesia and  
21 Colombia reported 21% of *M. leprae* positivity in SSS of HHC (38), 7.8% (49) and 16.0% in NS (50).  
22 Detection of host markers, such as serum IgM levels of anti-*M. leprae* phenolic glycolipid I (PGL-I),  
23 represents an alternative approach to diagnose infected individuals (51-53). However, although  
24 detection of *M. leprae* DNA as well as antibodies against PGL-I indicate infection with *M. leprae*,  
25 this does not necessarily result in disease. Thus, these tests alone are not sufficient to identify the

*M. leprae* genotypes in Bangladesh

1 complete leprosy spectrum (54, 55).  
2  
3 Bangladesh is a leprosy endemic country reporting up to 3,729 new leprosy cases in 2018 (8).  
4 However, *M. leprae* whole genomes (n=4) from Bangladesh, have only been described in one study  
5 (22) in which genotypes 1A, 1C and 1D were identified. To gain more insight into *M. leprae* genome  
6 variation and transmission routes in endemic areas in Bangladesh as well as the potential role of  
7 asymptomatic carriers, we further explored the diversity and transmission of *M. leprae* in four  
8 districts of the northwest of Bangladesh. We collected SSS and NS of 31 leprosy patients with a high  
9 bacterial load as well as 279 of their household contacts and characterized *M. leprae* DNA by WGS  
10 or Sanger sequencing. The resulting genotypes were correlated to the subjects' GIS location.  
11 Additionally, this is the first study to examine *M. leprae* DNA detection in comparison to anti-PGL-I  
12 IgM levels in plasma measured by up-converting reporter particles lateral flow assay (UCP-LFA).

## 1 **Results**

### 2 ***M. leprae* detection in patients and healthy household contacts**

3 At diagnosis of the index cases and recruitment of contacts into this study 250 household contacts had  
4 no signs or symptoms of leprosy or other diseases (HHC), whereas 22 household contacts were  
5 diagnosed as PB and seven as MB patients (Table S1, Supplementary Data 1).

6 Presence of *M. leprae* DNA was determined by RLEP PCR or qPCR in SSS and NS of leprosy patients  
7 and HHC (Figure 1, Supplementary Data 1): as expected in MB patients with bacteriological index (BI)  
8 2-6 *M. leprae* DNA was almost always detectable in both SSS (96.8%) and NS (90.9%). This was  
9 much lower in PB and MB patients with BI 0 ranging from 22.2% in SSS to 33.3% in NS. Positivity  
10 rates in HHC were not very different from those observed for PB and MB patients with BI 0, with  
11 12.3% positive samples in SSS and 18.0% in NS. Moreover, the overall cycle threshold (Ct) range was  
12 lower for SSS [16.3-37.1] compared to NS [20.1-39.4] showing that SSS contained more *M. leprae*  
13 DNA and is a preferred sample for its detection (Supplementary Data 1).

14 HHC (n=250) were followed up clinically for  $\geq 24$  months after sample collection and four of them  
15 developed leprosy within the first year. RLEP PCR performed on DNA isolated before disease  
16 occurrence showed a positive result from SSS in one patient (5 months before diagnosis) and a positive  
17 result from NS in another (8 months before diagnosis). All of the new cases developed PB leprosy with  
18 BI of 0 and three were genetically related to the index case (parent and child of index case H03 and  
19 second degree relative of index case H30) and one was the spouse (index case H10).

### 20 **Genome typing and antimicrobial resistance**

21 *M. leprae* genomes of SSS and NS were genotyped by WGS or Sanger sequencing. A total of 60  
22 samples (30 SSS and 30 NS) were selected for WGS with an RLEP qPCR Ct ranging from 16.2 to 37.2  
23 (Figure S1, Supplementary Data 1). A total of 27 samples from 21 subjects (21 SSS and 6 NS) were

*M. leprae* genotypes in Bangladesh

1 successfully sequenced with a coverage  $\geq 5$  (Table S2). The limiting Ct value was 26.2 for SSS and  
2 24.2 for NS.

3 On applying the genotyping system described by Monot et al. (3, 22), the following genotypes were  
4 found for these 21 subjects: 1A (n=5), 1B (n=4), 1C (n=3) and 1D (n=9). Interestingly, the four newly  
5 sequenced 1B genotype strains do not cluster with the two previously described 1B strains from Yemen  
6 and Martinique (Figure 2). Instead, they form a new cluster in the phylogenetic tree located between  
7 genotypes the 1A and 1B, which we refer to as 1B-Bangladesh (Figure 2, blue, Supplementary Data 1).  
8 Using Sanger sequencing, the *M. leprae* strain for eight additional individuals were determined as 1A  
9 (n=4) or 1D (n=4). Three subjects carried genotype 1 but subtype could not be established  
10 (Supplementary Data 1).

11 The SNP used to differentiate genotype 1C (A61425G; Met90Thr, mutated in genotypes 1D and 2-4) is  
12 located at *esxA*. In contrast to previous observations (3, 22), we found that this position is not  
13 phylogenetically informative as it is also found unmutated (A; Met) in strains from the genotype 3I and  
14 2E (Figure 2, green, Supplementary Data 2). Moreover, the 1C strains clustered in the middle of the 1D  
15 group suggesting that the previously described genotype 1C is part of the 1D genotype.

16 Finally, antimicrobial resistance was assessed in all genotyped strains either by WGS or Sanger  
17 sequencing. The latter was successful on 18 samples for *rpoB*, five sample for *folP1* and 15 samples for  
18 *gyrA* (Supplementary Data 1). None of the strains with a complete genome harbored drug-resistance  
19 mutations. One NS sample containing a missense mutation in the *rpoB* gene (Ser456Thr) in 50% of the  
20 sequences potentially leading to antimicrobial resistance (56) was identified by Sanger sequencing.  
21 Moreover, although not causing resistance, up to two silent mutations in three different positions of the  
22 *rpoB* gene relevant for antimicrobial resistance (432, 441 and 456) were also observed in several  
23 subjects.



## 1 **Distribution and possible transmission of *M. leprae* genotypes**

2 The most prevalent *M. leprae* genotype in the studied area of Bangladesh is 1D, found in 55% of the  
3 individuals (n=16, Table 1, Supplementary Data 1), followed by 1A in 31% (n=9), and 1B-Bangladesh  
4 in 14% (n=4). Genotype 1D is the most widely distributed throughout the whole area studied (Figure 3,  
5 blue and purple), whilst genotypes 1A and the here identified genotype 1B-Bangladesh are only  
6 observed in the eastern area (green and orange respectively). The latter genotype was found in 4  
7 individuals: two from the same household and two unrelated subjects residing 56, 51 and 11 km from  
8 each other. However, due to privacy regulations on patient information to third parties it could not be  
9 established whether subjects in different households had had contact with any of the others.

10 In a total of four households the same *M. leprae* genotype was detected in two individuals  
11 (Supplementary Data 1). In the first household, both subjects were MB patients and WGS showed no  
12 genetic variation at all between both patients' genomes (RB001 and RB003, 1B-Bangladesh genotype,  
13 Supplementary Data 2). In the second household with two MB patients, the *M. leprae* whole genome  
14 was only obtained from the index case but the same genotype, 1A, and a strain-specific SNP of the  
15 index case (Table S3 and S4) was also identified by Sanger sequencing in the other patient (RB182 and  
16 RB266). In the last two households, the genotype of strains from both MB index cases' were  
17 determined by WGS (RB030, genotype 1D) and, by Sanger sequencing (RB065, genotype 1D-*esxA*),  
18 while the *M. leprae* genotype 1 was located in the NS of both HHC but no further subtyping was  
19 possible.

## 20 **Comparison of *M. leprae* genomes from SSS and NS**

21 *M. leprae* whole genomes of six patients were successfully recovered from both SSS and NS. Genomic  
22 comparison showed no differences between DNA from SSS and NS for two patients: RB001-RN001  
23 (genotype 1B-Bangladesh) and RB048-RN059 (genotype 1D-*esxA*, Supplementary Data 2, Figure 2).

*M. leprae* genotypes in Bangladesh

1 In a third patient (RB073-RN084, genotype 1A), both strains were identical except that in the NS strain  
2 13% of 32 reads in *ml1512* harbored a T1824441C (Gly56Asp) (Table 2). Interestingly, *ml1512* which  
3 encodes a ribonuclease J is one of the most mutated genes among all *M. leprae* strains (29) and  
4 mutations at this gene were also observed in two different patients: in the NS of RN022-RB053  
5 (genotype 1D) 28% of 115 reads had a mutated allele (G1823127A; Ser494Leu) and 8.5% of 59 reads  
6 had an insertion of a C at position 1823614 probably leading to a deleterious frameshift; in the SSS of  
7 RB074-RN095 (genotype 1B-Bangladesh) 91% of 158 reads presented a missense mutation  
8 (G1823098A; Leu504Phe). Interestingly, RB074 harbored a G660474C mutation in *metK*, a probable  
9 methionine adenosyl-transferase, which was also found in 76% of 16 reads of the NS and is uniquely  
10 found in this subject's *M. leprae* genomes. Additionally, RN095 also displayed mutations at several  
11 positions in *ml1750* (a putative nucleotide cyclase): 60% of 40 reads had C2116695A (Pro100Thr),  
12 23% of 40 reads had A2116670G (Gln108Arg) and 26% of 27 reads had G2116670A mutation  
13 (Arg168His). These positions were partially or totally mutated in other strains from different  
14 genotypes: SM1 (100% Pro100Ser; genotype 4), MI9-81 (Mali, 30% Arg168His; genotype 4N) and  
15 Md05036 (Madagascar, 90% Gln108Arg, genotype 1D-Malagasy) (29, 57).

16 The patient with the *M. leprae* strains that were the most genetically different between the NS and SSS  
17 carried the genotype 1B-Bangladesh (RB069 and RN165). The NS strain had a mixed population in  
18 *glpQ* (25% of 257 reads C9231T, Leu34Phe) and *ml1752* (16% of 307 reads C2121552T, Val226Ile).  
19 These genes encode a glycerophosphoryl diester phosphodiesterase and a conserved hypothetical  
20 protein. Notably, *ml1752* is also one of the most hypermutated genes in *M. leprae* (29).

21 For 11 patients a whole genome sequence was recovered only from SSS but Sanger sequencing was  
22 successfully performed to identify the subtype in NS. The same subtype observed in SSS was also  
23 found in the NS of these 11 patients. Moreover, unique *M. leprae* SNPs identified in the genomes of  
24 the SSS (Table S3 and S4) were also detected in seven of the genomes of the NS of these patients  
25 (Supplementary Data 1).

## 1 **Combining host and pathogen detection**

2 Anti-PGL-I IgM levels were determined in plasma of 308 subjects. All MB patients with BI 2-6 (n=33)  
3 showed high levels for anti-PGL-I IgM (Table 3) in line with the general consensus (51, 58). Out of the  
4 patients (both MB and PB) with BI 0 (n=27), nine (33.3%) were positive for anti-PGL-I IgM.  
5 Similarly, 36.8% of HHC showed positivity (n=92). From these 92 positive individuals, 70 were  
6 neither positive for SSS nor NS RLEP PCR (Supplementary Data 1).

7 Of the four contacts who developed leprosy within the first year after sample collection, two were  
8 positive for anti-PGL-I IgM whilst negative for RLEP PCRs 10 and 12 months before diagnosis. Since  
9 the two other subjects had a positive RLEP PCR in SSS or NS 5 or 8 months before diagnosis, it can be  
10 concluded that all of the new cases showed positivity either for host- or pathogen-associated  
11 diagnostics 5-12 months before developing disease.

12 Individual anti-PGL-I levels were compared to RLEP Ct values in SSS and NS samples (Figure 4),  
13 showing an expected negative correlation between anti-PGL-I ratio and Ct value since both values are  
14 associated with BI. A subtle difference can be observed in the correlation between anti-PGL-I IgM  
15 levels and RLEP Ct if the qPCR was performed on either SSS or NS DNA, with a coefficient of  
16 determination ( $R^2$ ) 0.73 and 0.69 respectively.

## 1 **Discussion**

2 In this study we investigated *M. leprae* transmission patterns in Bangladesh by detecting and  
3 sequencing *M. leprae* DNA derived from SSS and NS of patients and their household members. Our  
4 data represents the first report of *M. leprae* DNA detection in HHC from Bangladesh. We observed  
5 moderate positivity in HHC which was similar to positivity of leprosy patients with BI 0. A new  
6 genotype, 1B-Bangladesh, was sequenced and we showed that the previously described 1C genotype is  
7 part of the 1D group. Additionally, a negative correlation between RLEP Ct values indicating the  
8 amount of *M. leprae* DNA and anti-PGL-I IgM levels was observed.

9  
10 *M. leprae* DNA detection frequency in HHC from Bangladesh (12.3% in SSS and 18.0% in NS) was in  
11 line with previous studies conducted in several hyperendemic areas of Brazil, Colombia and Indonesia  
12 (45, 47-50). In India higher positivity (21%) in SSS of HHC was reported (38) whereas in a Brazilian  
13 study from Uberlandia, up to 49% of positivity in NS was observed (12). Three factors may limit the  
14 translation of these high positive results from India and Brazil to our study: i) the sample sizes of the  
15 Indian and Brazilian studies were smaller (n=28 and n=104, respectively versus n=250 HHC in this  
16 study); ii) we conducted a more stringent approach by testing the samples in three independent PCRs;  
17 and iii) the epidemiology and incidence of MB cases in India and Brazil differ from the studied area in  
18 Bangladesh where MB leprosy cases occur less frequently than PB and also usually display a low BI  
19 (59).

20 *M. leprae* DNA in the nose does not indicate disease but (transient) colonization whilst presence of *M.*  
21 *leprae* in SSS indicates infection. Thus, the higher RLEP PCR positivity in NS compared to SSS in  
22 patients with BI 0 and HHC likely represents the (virtual) absence of bacteria causing infection in these  
23 individuals despite colonization.

24

*M. leprae* genotypes in Bangladesh

1 A longitudinal study conducted in Brazil (60), investigated SSS from 995 HHC by qPCR including  
2 follow-up for at least 3 years with occurrence of five new cases. The authors reported 20% qPCR  
3 positivity in HHC representing future new cases compared to 9% in HHC without disease. However,  
4 this difference was not significant. In line with that study, we found that *M. leprae* DNA detection was  
5 slightly higher (25% vs 18% in NS and 25% vs 12% in SSS) in contacts who developed disease  
6 compared to those who did not. Additionally, we determined anti-PGL-I IgM levels, which correlated  
7 well with Ct qPCR values. Notwithstanding this correlation, serology provided added value: when  
8 positivity in any of the three techniques was considered (NS PCR, SSS PCR or anti PGL-I), all of the  
9 contacts (n=4) who developed leprosy within the first year after sample collection, were identified. In  
10 agreement with this, a combination of host and pathogen markers was previously integrated in a  
11 machine learning model using qPCR and serological data (antibodies against LID-1 or ND-O-LID)  
12 (46) to identify prospective leprosy patients among contacts leading to an increased sensitivity in  
13 diagnosis, particularly in PB leprosy. It is of note that in our study, three of the four contacts who  
14 developed leprosy were genetically related to the index cases in their households, stressing the  
15 previously described role of genetic inheritance in the development of leprosy (14-17, 61). For this  
16 reason, the association between leprosy and the genetics of this Bangladeshi population is currently  
17 being studied.

18

19 Genotype 1 was identified in all the *M. leprae* genomes retrieved from Bangladesh, consistent with  
20 previous data from Monot et al. (22). In Bangladesh, leprosy was likely introduced through the  
21 southern Asian route (genotype 1) leading to the spread of *M. leprae* into the Indian subcontinent,  
22 Indonesia and the Philippines (22, 29). Subtype 1D was predominantly present in Bangladesh but in  
23 addition we detected 1A and identified a new 1B-Bangladesh genotype. This new genotype is thus far  
24 restricted to Bangladesh and two of the four individuals carrying this strain were part of the same  
25 household whilst the other two did not have any relationship with each other and were located in

*M. leprae* genotypes in Bangladesh

1 different areas with a distance of up to 56 km between them. This suggests that this new genotype  
2 could be a common subtype in Bangladesh although additional studies are required to confirm this.  
3 Thus, it is of interest to include the 1B-Bangladesh SNP specific primers in future epidemiological  
4 studies, particularly in other (neighbouring) Asian countries such as India where genotype 1 is widely  
5 established (22).

6 In contrast to the general belief (3, 22), we observed that subtype 1C does not form an independent  
7 subtype but actually belongs to subtype 1D. SNP61425 used to distinguish genotypes 1A-C is located  
8 at *esxA* encoding the virulence factor ESAT-6 (22). The Esx protein family also revealed high diversity  
9 in the more pathogenic mycobacterium, *M. tuberculosis* (62), and is involved in host-pathogen  
10 interaction. Of note is that ESAT-6 (ML0049) is a potent T-cell antigen (63, 64), thus mutations in  
11 *esxA* gene might indicate drift due to immune pressure potentially explaining the occurrence of  
12 mutations at SNP61425 in different genotypes.

13  
14 In a recent survey in 19 countries during 2009-2015 (65), 8% of the cases presented mutations resulting  
15 in antimicrobial resistance and resistance to up to two different drugs was detected. In our study, which  
16 is the first investigating *M. leprae* drug resistance in Bangladesh, we detected no resistance by WGS,  
17 however, a partial missense mutation in the codon for Ser456 of the *rpoB* gene potentially leading to  
18 rifampicin resistance (n=1) was observed by Sanger sequencing. This could be the result of a mixed  
19 infection or an emerging mutation of the *M. leprae* strain occurring in the patient. Silent mutations in  
20 the *rpoB* gene were detected in several locations, which indicates that mutations do occur, and this may  
21 eventually lead to missense mutations conferring antimicrobial resistance. However, drug resistance is  
22 not only induced by genetic mutations in drug targets, efflux systems resulting in antimicrobial  
23 resistance have also been described for *M. leprae* (66). This mechanism of drug resistance is unnoticed  
24 in genomic tests and needs to be further investigated for leprosy especially in the light of the huge

*M. leprae* genotypes in Bangladesh

1 efforts recently initiated and WHO-endorsed for post-exposure prophylaxis (PEP) using antibiotic  
2 regimens (44, 67, 68).

3  
4 Despite our finding that NS samples were more frequently positive for *M. leprae* DNA, recovery of *M.*  
5 *leprae* whole genomes from SSS has proven to be more successful than from NS. This is due to the  
6 higher number of bacteria in SSS of patients. However, the importance of genotyping NS as well as  
7 skin biopsies or SSS to better understand transmission has been previously discussed (69), as the nasal  
8 respiratory route remains one of the most plausible modes of infection (12, 13). In a recent study, skin  
9 biopsies and NS of patients were compared by VNTR typing and the authors found that out of 38  
10 patients, differences between SSS and NS in seven loci were observed in 33 patients (70). Although the  
11 *M. leprae* genomes from SSS and NS analysed in our study were almost identical, we observed that  
12 genomes obtained from NS harboured more mutations, especially in previously reported (29)  
13 hypermutated genes. This could be an indication of in-host evolution in the nasal mucosa, mixed  
14 infection or mixed colonization. Thus, it may imply that colonization occurred with two different  
15 strains causing a co-infection or that one is present, likely from a later colonization, but does not cause  
16 the disease.

17 The presence of mixed infections emphasises once more the importance of monitoring asymptomatic  
18 carriers, who may contribute to the spread of the pathogen. Therefore, providing PEP only to the  
19 (close) contacts of leprosy patients might not be sufficient to stop transmission. Instead, an approach  
20 including the entire community but targeting only individuals testing positive for *M. leprae* DNA or  
21 host immune markers associated to *M. leprae* infection, would represent a preferred strategy for PEP.

## 1 **Materials and methods**

### 2 **Study design and sample collection**

3 Newly diagnosed leprosy patients (index case, n=31) with BI  $\geq$  2 and 3-15 household contacts of each  
4 index case (n=279) were recruited between July 2017 and May 2018 (Table S1, Supplementary Data 1)  
5 in four districts of Bangladesh (Nilphamari, Rangpur, Panchagar and Thakurgaon). Patients with five or  
6 fewer skin lesions and BI 0 were grouped as PB leprosy. Patients with more than five skin lesions were  
7 grouped as MB leprosy and BI was determined. The prevalence in the districts where this study was  
8 performed was 0.9 per 10,000 and the new case detection rate 1.18 per 10,000 (Rural health program,  
9 the leprosy mission Bangladesh, yearly district activity report 2018).

10 For *M. leprae* detection and characterization, SSS from 2-3 sites of the earlobe and NS (tip wrapped  
11 with traditional fiber, CLASSIQSwabs, Copan, Brescia, Italy) were collected and stored in 1 ml 70%  
12 ethanol at -20 °C until further use. For immunological analysis, plasma was collected (51, 54, 71).

13 Subjects included in the study were followed up for surveillance of new case occurrence for  $\geq$  24  
14 months after sample collection.

### 15 **Ethics Statement**

16 Subjects were recruited following the Helsinki Declaration (2008 revision). The National Research  
17 Ethics Committee approved the study (BMRC/NREC/2016-2019/214) and participants were informed  
18 about the study objectives, the samples and their right to refuse to take part or withdraw without  
19 consequences for their treatment. All subjects gave informed consent before enrollment and treatment  
20 was provided according to national guidelines.

### 21 **DNA isolation from slit skin smears and nasal swabs**

22 DNA was isolated using DNeasy Blood & Tissue Kit (Qiagen, Valencia, CA) as per manufacturer's  
23 instructions with minor modifications. Briefly, tubes containing 1 ml 70% ethanol and SSS were  
24 vortexed for 15 seconds. SSS were removed and tubes were centrifuged for 15 minutes at 14000 rpm.



*M. leprae* genotypes in Bangladesh

1 Supernatants were removed and buffer ATL (200  $\mu$ l) and proteinase K (20  $\mu$ l) added. NS were  
2 transferred to new microtubes and the microtubes containing the remaining ethanol were centrifuged at  
3 14000 rpm for 15 minutes. Supernatants were removed and NS were inserted again in the tubes, prior  
4 addition of ATL buffer (400  $\mu$ l) and proteinase K (20  $\mu$ l). SSS and NS samples were incubated at 56 °C  
5 for 1 h at 1100 rpm. Next, AL buffer (200  $\mu$ l) was added and incubated at 70 °C for 10 min at 1400  
6 rpm. Column extraction was performed after absolute ethanol precipitation (200  $\mu$ l) as per  
7 manufacturer's instructions. To avoid cross contamination tweezers were cleaned first with hydrogen  
8 peroxide and then with ethanol between samples.

9 **RLEP PCR and qPCR**

10 RLEP PCR (23) was performed as previously described (36). Briefly, the 129 bp RLEP sequence was  
11 amplified in 50  $\mu$ l by addition of 10  $\mu$ l 5x Gotaq® Flexi buffer (Promega, Madison, WI), 5  $\mu$ l MgCl<sub>2</sub>  
12 (25 mM), 2  $\mu$ l dNTP mix (5 mM), 0.25  $\mu$ l Gotaq® G2 Flexi DNA Polymerase (5 u/ $\mu$ l), 5  $\mu$ l (2  $\mu$ M)  
13 forward and reverse primers (Table S5) and 5  $\mu$ l template DNA, water (negative control) or *M. leprae*  
14 DNA (Br4923 or Thai-53 DNA, BEI Resources, Manassas, VA) as positive control. PCR mixes were  
15 subjected to 2 min at 95 °C followed by 40 cycles of 30 s at 95 °C, 30 s at 65°C and 30 s at 72 °C and a  
16 final extension of 10 min at 72 °C. PCR products (15 $\mu$ l) were used for electrophoresis in a 3.5%  
17 agarose gel at 130V. Amplified DNA was visualized by Midori Green Advance staining (Nippon  
18 Genetics Europe, Dueren, Germany) using iBright™ FL1000 Imaging System (Invitrogen, Carlsbad,  
19 CA).

20 Samples from index cases and a selectin of contacts for sequencing were also evaluated by qPCR (72).  
21 The mix included 12.5  $\mu$ l TaqMan Universal Master Mix II (Applied Biosystems, Foster City, CA), 0.5  
22  $\mu$ l (25  $\mu$ M) forward and reverse primers (Table S5), 0.5  $\mu$ l (10  $\mu$ M) TaqMan probe (Table S5) and 5  $\mu$ l  
23 template DNA were mixed in a final volume of 25  $\mu$ l. DNA was amplified using the following profile:  
24 2 min at 50°C and 10 min at 95°C followed by 40 cycles of 15 s at 95°C and 1 min at 60°C with a

*M. leprae* genotypes in Bangladesh

1 QuantStudio 6 Flex Real-Time PCR System (Applied Biosystems). Presence of *M. leprae* DNA was  
2 considered if a sample was positive for RLEP qPCR with a Ct lower than 37.5 or was positive for  
3 RLEP PCR at least in two out of three indecently performed PCRs to avoid false positives.

#### 4 **Library preparation and enrichment**

5 A total of 60 DNA extracts were selected for sequencing, including 30 from SSS and 30 from NS  
6 (Figure S1, Supplementary Data 1). At least one sample from each index leprosy patient was selected  
7 as well as RLEP positive samples of HHC or patients who were household contacts of the index case  
8 (selection based on Ct value and household overlap). A maximum of 1µg of DNA in a final volume of  
9 50µL was mechanically fragmented to 300 bp using the S220 Focused-ultrasonicator (Covaris)  
10 following the manufacturer's recommendations and cleaned-up using a 1.8x ratio of AMPure beads. Up  
11 to 1µg of fragmented DNA was used to prepare indexed libraries using the Kapa Hyperprep kit  
12 (Roche) and the Kapa dual-indexed adapter kit as previously described (29) followed by two rounds of  
13 amplification. All libraries were quantified using the Qubit fluorimeter (Thermo Fisher Scientific,  
14 Waltham, MA), and the fragment size distribution was assessed using a fragment analyzer.

15 Libraries were target enriched for the *M. leprae* genome using a custom MYbaits Whole Genome  
16 Enrichment kit (ArborBioscience) as previously described (5). Briefly, biotinylated RNA baits were  
17 prepared using DNA from *M. leprae* Br4923. A total of 1500 ng of each amplified libraries was used  
18 for enrichment. Each library was pooled prior to enrichment with another library with similar qPCR Ct  
19 value. Enrichment was conducted according to the MYbaits protocol with the hybridization being  
20 carried out at 65 °C for 24 hours. After elution, all pools were amplified using the Kapa amplification  
21 kit with universal P5 and P7 primers (Roche). All amplification reactions were cleaned up using the  
22 AMPure beads (1X ratio).

## 1 **Illumina sequencing**

2 Pools were multiplexed on one lane of a NextSeq instrument with a total amount of 20-30 million reads  
3 per pools. Some libraries were deep sequenced based on the mapping statistics obtained in the first run.  
4 Raw reads were processed and aligned to *M. leprae* TN reference genome (GenBank accession number  
5 AL450380.1) as previously described using an in-house pipeline (29). A minimum depth coverage of 5  
6 was considered for further phylogenetic analysis.

## 7 **Sequencing analysis**

8 Genome comparison was based on analysis of SNPs (analyzed with VarScan v2.3.9(73)) and Indels  
9 (analyzed with Platypus v0.8.171(74)) as formerly reported (29). The newly sequenced *M. leprae*  
10 genomes were aligned with 232 genomes available in public databases (31, 57). Sites below 90 and  
11 above 10% alignment difference were also reported. A comparison to 259 *M. leprae* genomes  
12 (including 27 new genomes) allowed the identification of unique SNPs per index case. Each candidate  
13 SNP or Indel was checked manually on Integrative Genomics Viewer (75).

## 14 **Genotyping and antimicrobial resistance by Sanger sequencing**

15 To further characterize the *M. leprae* strains for which the whole genome sequence was not obtained,  
16 specific primers were designed to perform Sanger sequencing based on unique SNPs (Table S3 and S4)  
17 of each index case strain. Additionally, Sanger sequencing was performed after amplifying several loci  
18 (Table S5) to subtype the genomes based on standard the *M. leprae* classification (3, 22) and to  
19 determine antimicrobial resistance to rifampicin (*rpoB*), dapsone (*folP1*) or ofloxacin (*gyrA*). PCRs  
20 were performed with 5 µl of template DNA using the aforementioned PCR mixes. DNA was denatured  
21 for 2 minutes at 95°C, followed by 45 cycles of 30 s at 95°C, 30 s at 50-58 °C and 30 s at 72 °C and a  
22 final extension cycle of 10 min at 72°C. PCR products were resolved by agarose gel electrophoresis as  
23 explained above. PCR products showing a band were purified prior to sequencing using the Wizard SV  
24 Gel and PCR Clean-Up System (Promega). Sequencing was performed on the ABI3730xl system

*M. leprae* genotypes in Bangladesh

1 (Applied Biosystems) using the BigDye Terminator Cycle Sequencing Kit (Thermo Fisher Scientific).  
2 Sequences were analyzed using Bioedit v7.0.5.3.

3 **Anti-PGL-I UCP-LFA**

4 Lateral flow assays (LFA) were performed using the LUMC developed LFA based on luminescent up-  
5 converting reporter particles (UCP) for quantitative detection of anti-*M. leprae* PGL-I IgM as  
6 previously described (51, 54, 71). Plasma samples (n=308, 2 samples excluded due to labeling mistake)  
7 were thawed and diluted (1:50) in assay buffer. Strips were placed in microtiter plate wells containing  
8 50  $\mu$ l diluted samples and target specific UCP conjugate (PGL-I, 400 ng). Immunochromatography  
9 continued for at least 30 min until dry. Scanning of the LFA strips was performed by LFA strip readers  
10 adapted for measurement of the UCP label (UPCON; Labrox, Finland). Results are displayed as the  
11 Ratio (R) value between Test and Flow-Control signal based on relative fluorescence units (RFUs)  
12 measured at the respective lines. The threshold for positivity for the  $\alpha$ PGL-I UCP-LFA was 0.10.

## 1 **Data availability**

2 Sequence data are available from the NCBI Sequence Read Archive (SRA) under the bioprojects  
3 PRJNA592722 & PRJNA605605 and biosamples SAMN13438761-771 and SAMN14072760-775.

4 Temporary link:

5 <https://dataview.ncbi.nlm.nih.gov/object/PRJNA592722?reviewer=2763je9kku1au6ebvp16hj2pt>

6 <https://dataview.ncbi.nlm.nih.gov/object/PRJNA605605?reviewer=qon41sa7kahsbnc0k1o18nbsun>

## 7 **Acknowledgements**

8 The authors gratefully acknowledge all patients and control participants. LUMC. Erasmus MC and  
9 TLMI,B are part of the IDEAL (*I*nitiative for *D*iagnostic and *E*pidemiological Assays for *L*eprosy)  
10 Consortium.

## 11 **Funding statement**

12 This study was supported by an R2STOP Research grant from effect:hope, Canada and The Mission to  
13 End Leprosy, Ireland; the Order of Malta-Grants-for-Leprosy-Research (MALTALEP, to AG); the  
14 Foundation Raoul Follereau (to STC); the Q.M. Gastmann-Wichers Foundation (to AG); the Leprosy  
15 Research Initiative (LRI) together with the Turing Foundation (ILEP#703.15.07).

16 The funders had no role in study design, data collection and analysis, decision to publish, or  
17 preparation of the manuscript.

## 18 **Author contributions**

19 Conceptualization: AG, MTC, JHR

20 Data Curation: MTC, JCR

21 Formal Analysis: MTC, CA, AH, AB

*M. leprae* genotypes in Bangladesh

- 1 Funding Acquisition: AG, JHR
- 2 Investigation: MTC, CA, EMV, LP, AH
- 3 Resources: MK, KA, PC, STC
- 4 Supervision: AG
- 5 Writing original draft: MTC
- 6 Writing – Review & Editing: MTC, AG
- 7 All authors reviewed, discussed, and agreed with manuscript.

8 **Conflicts of interest**

- 9 Conflicts of interest: none.

## 1 References

- 2 1. Han XY, Seo YH, Sizer KC, Schoberle T, May GS, Spencer JS, et al. A new *Mycobacterium* species causing  
3 diffuse lepromatous leprosy. *American journal of clinical pathology*. 2008;130(6):856-64.
- 4 2. Avanzi C, Del-Pozo J, Benjak A, Stevenson K, Simpson VR, Busso P, et al. Red squirrels in the British Isles are  
5 infected with leprosy bacilli. *Science*. 2016;354(6313):744-7.
- 6 3. Truman RW, Singh P, Sharma R, Busso P, Rougemont J, Paniz-Mondolfi A, et al. Probable zoonotic leprosy in the  
7 Southern United States. *The New England journal of medicine*. 2011;364(17):1626-33.
- 8 4. Sharma R, Singh P, Loughry WJ, Lockhart JM, Inman WB, Duthie MS, et al. Zoonotic leprosy in the Southeastern  
9 United States. *Emerg Infect Dis*. 2015;21(12):2127-34.
- 10 5. Honap TP, Pfister LA, Housman G, Mills S, Tarara RP, Suzuki K, et al. *Mycobacterium leprae* genomes from  
11 naturally infected nonhuman primates. *PLoS neglected tropical diseases*. 2018;12(1):e0006190.
- 12 6. Schilling A-K, van Hooij A, Corstjens P, Lurz P, DelPozo J, Stevenson K, et al. Detection of humoral immunity to  
13 mycobacteria causing leprosy in Eurasian red squirrels (*Sciurus vulgaris*) using a quantitative rapid test 2019.
- 14 7. Tio-Coma M, Sprong H, Kik M, van Dissel JT, Han XY, Pieters T, et al. Lack of evidence for the presence of  
15 leprosy bacilli in red squirrels from North-West Europe. *Transboundary and emerging diseases*. 2019.
- 16 8. WHO. Global leprosy update, 2018: moving towards a leprosy-free world. *Weekly Epidemiological Record*.  
17 2019;94(35/36):389-412.
- 18 9. Singh P, Cole ST. *Mycobacterium leprae*: genes, pseudogenes and genetic diversity. *Future Microbiol*.  
19 2011;6(1):57-71.
- 20 10. Ridley DS, Jopling WH. Classification of leprosy according to immunity. A five-group system. *Int J Lepr Other*  
21 *Mycobact Dis*. 1966;34(3):255-73.
- 22 11. Kumar B, Uprety S, Dogra S. Clinical diagnosis of leprosy. In: Scollard DM, Gills TP, editors. *International*  
23 *textbook of leprosy*. [www.internationaltextbookofleprosy.org.2017](http://www.internationaltextbookofleprosy.org.2017).
- 24 12. Araujo S, Freitas LO, Goulart LR, Goulart IM. Molecular evidence for the aerial route of infection of  
25 *Mycobacterium leprae* and the role of asymptomatic carriers in the persistence of leprosy. *Clin Infect Dis*.  
26 2016;63(11):1412-20.
- 27 13. Bratschi MW, Steinmann P, Wickenden A, Gillis TP. Current knowledge on *Mycobacterium leprae* transmission: a  
28 systematic literature review. *Leprosy review*. 2015;86(2):142-55.
- 29 14. Zhang FR, Huang W, Chen SM, Sun LD, Liu H, Li Y, et al. Genomewide association study of leprosy. *N Engl J*  
30 *Med*. 2009;361(27):2609-18.
- 31 15. Mira MT, Alcais A, Nguyen VT, Moraes MO, Di Flumeri C, Vu HT, et al. Susceptibility to leprosy is associated  
32 with PARK2 and PACRG. *Nature*. 2004;427(6975):636-40.
- 33 16. Wang D, Xu L, Lv L, Su LY, Fan Y, Zhang DF, et al. Association of the LRRK2 genetic polymorphisms with  
34 leprosy in Han Chinese from Southwest China. *Genes Immun*. 2015;16(2):112-9.
- 35 17. Sales-Marques C, Cardoso CC, Alvarado-Arnez LE, Illaramendi X, Sales AM, Hacker MA, et al. Genetic  
36 polymorphisms of the IL6 and NOD2 genes are risk factors for inflammatory reactions in leprosy. *PLoS neglected tropical*  
37 *diseases*. 2017;11(7):e0005754.
- 38 18. Moet FJ, Meima A, Oskam L, Richardus JH. Risk factors for the development of clinical leprosy among contacts,  
39 and their relevance for targeted interventions. *Leprosy review*. 2004;75(4):310-26.
- 40 19. Dwivedi VP, Banerjee A, Das I, Saha A, Dutta M, Bhardwaj B, et al. Diet and nutrition: An important risk factor  
41 in leprosy. *Microbial pathogenesis*. 2019;137:103714.
- 42 20. Cole ST, Eiglmeier K, Parkhill J, James KD, Thomson NR, Wheeler PR, et al. Massive gene decay in the leprosy  
43 bacillus. *Nature*. 2001;409(6823):1007-11.
- 44 21. Monot M, Honore N, Garnier T, Araoz R, Coppee JY, Lacroix C, et al. On the origin of leprosy. *Science*.  
45 2005;308(5724):1040-2.
- 46 22. Monot M, Honore N, Garnier T, Zidane N, Sherafi D, Paniz-Mondolfi A, et al. Comparative genomic and  
47 phylogeographic analysis of *Mycobacterium leprae*. *Nature genetics*. 2009;41(12):1282-9.
- 48 23. Donoghue HD, Holton J, Spigelman M. PCR primers that can detect low levels of *Mycobacterium leprae* DNA.  
49 *Journal of medical microbiology*. 2001;50(2):177-82.
- 50 24. Truman RW, Andrews PK, Robbins NY, Adams LB, Krahenbuhl JL, Gillis TP. Enumeration of *Mycobacterium*  
51 *leprae* Using Real-Time PCR. *PLoS neglected tropical diseases*. 2008;2(11):e328.
- 52 25. Martinez AN, Ribeiro-Alves M, Sarno EN, Moraes MO. Evaluation of qPCR-based assays for leprosy diagnosis  
53 directly in clinical specimens. *PLoS neglected tropical diseases*. 2011;5(10):e1354.
- 54 26. Braet S, Vandelannoote K, Meehan CJ, Brum Fontes AN, Hasker E, Rosa PS, et al. The repetitive element RLEP  
55 is a highly specific target for detection of *Mycobacterium leprae*. *Journal of clinical microbiology*. 2018;56(3).
- 56 27. Han XY, Silva FJ. On the age of leprosy. *PLoS neglected tropical diseases*. 2014;8(2):e2544-e.

*M. leprae* genotypes in Bangladesh

- 1 28. Donoghue HD. Tuberculosis and leprosy associated with historical human population movements in Europe and  
2 beyond - an overview based on mycobacterial ancient DNA. *Annals of human biology*. 2019;46(2):120-8.
- 3 29. Benjak A, Avanzi C, Singh P, Loiseau C, Girma S, Busso P, et al. Phylogenomics and antimicrobial resistance of  
4 the leprosy bacillus *Mycobacterium leprae*. *Nat Commun*. 2018;9(1):352.
- 5 30. Schuenemann VJ, Singh P, Mendum TA, Krause-Kyora B, Jager G, Bos KI, et al. Genome-wide comparison of  
6 medieval and modern *Mycobacterium leprae*. *Science*. 2013;341(6142):179-83.
- 7 31. Schuenemann VJ, Avanzi C, Krause-Kyora B, Seitz A, Herbig A, Inskip S, et al. Ancient genomes reveal a high  
8 diversity of *Mycobacterium leprae* in medieval Europe. *PLoS pathogens*. 2018;14(5):e1006997.
- 9 32. Mendum TA, Schuenemann VJ, Roffey S, Taylor GM, Wu H, Singh P, et al. *Mycobacterium leprae* genomes from  
10 a British medieval leprosy hospital: towards understanding an ancient epidemic. *BMC genomics*. 2014;15:270.
- 11 33. Suzuki K, Takigawa W, Tanigawa K, Nakamura K, Ishido Y, Kawashima A, et al. Detection of *Mycobacterium*  
12 *leprae* DNA from archaeological skeletal remains in Japan using whole genome amplification and polymerase chain  
13 reaction. *PloS one*. 2010;5(8):e12422.
- 14 34. Krause-Kyora B, Nutsua M, Boehme L, Pierini F, Pedersen DD, Kornell S-C, et al. Ancient DNA study reveals  
15 HLA susceptibility locus for leprosy in medieval Europeans. *Nat Commun*. 2018;9(1):1569-.
- 16 35. Schilling A-K, Avanzi C, Ulrich RG, Busso P, Pisanu B, Ferrari N, et al. British Red Squirrels Remain the Only  
17 Known Wild Rodent Host for Leprosy Bacilli. *Frontiers in Veterinary Science*. 2019;6(8).
- 18 36. Tió-Coma M, Wijnands T, Pierneef L, Schilling AK, Alam K, Roy JC, et al. Detection of *Mycobacterium leprae*  
19 DNA in soil: multiple needles in the haystack. *Scientific reports*. 2019;9(1):3165.
- 20 37. Lavania M, Katoch K, Sachan P, Dubey A, Kapoor S, Kashyap M, et al. Detection of *Mycobacterium leprae* DNA  
21 from soil samples by PCR targeting RLEP sequences. *J Commun Dis*. 2006;38(3):269-73.
- 22 38. Turankar RP, Lavania M, Chaitanya VS, Sengupta U, Darlong J, Darlong F, et al. Single nucleotide  
23 polymorphism-based molecular typing of *M. leprae* from multicase families of leprosy patients and their surroundings to  
24 understand the transmission of leprosy. *Clin Microbiol Infect*. 2014;20(3):O142-9.
- 25 39. Turankar RP, Lavania M, Singh M, Siva Sai KS, Jadhav RS. Dynamics of *Mycobacterium leprae* transmission in  
26 environmental context: deciphering the role of environment as a potential reservoir. *Infection, genetics and evolution :  
27 journal of molecular epidemiology and evolutionary genetics in infectious diseases*. 2012;12(1):121-6.
- 28 40. Turankar RP, Lavania M, Singh M, Sengupta U, Siva Sai K, Jadhav RS. Presence of viable *Mycobacterium leprae*  
29 in environmental specimens around houses of leprosy patients. *Indian J Med Microbiol*. 2016;34(3):315-21.
- 30 41. Lavania M, Katoch K, Katoch VM, Gupta AK, Chauhan DS, Sharma R, et al. Detection of viable *Mycobacterium*  
31 *leprae* in soil samples: insights into possible sources of transmission of leprosy. *Infection, genetics and evolution : journal of  
32 molecular epidemiology and evolutionary genetics in infectious diseases*. 2008;8(5):627-31.
- 33 42. Turankar RP, Lavania M, Darlong J, Siva Sai KSR, Sengupta U, Jadhav RS. Survival of *Mycobacterium leprae*  
34 and association with *Acanthamoeba* from environmental samples in the inhabitant areas of active leprosy cases: A cross  
35 sectional study from endemic pockets of Purulia, West Bengal. *Infection, genetics and evolution : journal of molecular  
36 epidemiology and evolutionary genetics in infectious diseases*. 2019;72:199-204.
- 37 43. Van Dissel JT, Pieters T, Geluk A, Maat G, Menke HE, Tio-Coma M, et al. Archival, paleopathological and  
38 aDNA-based techniques in leprosy research and the case of Father Petrus Donders at the Leprosarium 'Batavia', Suriname.  
39 *International journal of paleopathology*. 2019;27:1-8.
- 40 44. Richardus R, Alam K, Kundu K, Chandra Roy J, Zafar T, Chowdhury AS, et al. Effectiveness of single-dose  
41 rifampicin after BCG vaccination to prevent leprosy in close contacts of patients with newly diagnosed leprosy: A cluster  
42 randomized controlled trial. *International journal of infectious diseases : IJID : official publication of the International  
43 Society for Infectious Diseases*. 2019;88:65-72.
- 44 45. Gama RS, Gomides TAR, Gama CFM, Moreira SJM, de Neves Manta FS, de Oliveira LBP, et al. High frequency  
45 of *M. leprae* DNA detection in asymptomatic household contacts. *BMC infectious diseases*. 2018;18(1):153.
- 46 46. Gama RS, Souza MLM, Sarno EN, Moraes MO, Goncalves A, Stefani MMA, et al. A novel integrated molecular  
47 and serological analysis method to predict new cases of leprosy amongst household contacts. *PLoS neglected tropical  
48 diseases*. 2019;13(6):e0007400.
- 49 47. Brito e Cabral P, Junior JE, de Macedo AC, Alves AR, Goncalves TB, Brito e Cabral TC, et al. Anti-PGL1  
50 salivary IgA/IgM, serum IgG/IgM, and nasal *Mycobacterium leprae* DNA in individuals with household contact with  
51 leprosy. *International journal of infectious diseases : IJID : official publication of the International Society for Infectious  
52 Diseases*. 2013;17(11):e1005-10.
- 53 48. Carvalho RS, Foschiani IM, Costa M, Marta SN, da Cunha Lopes Virmond M. Early detection of *M. leprae* by  
54 qPCR in untreated patients and their contacts: results for nasal swab and palate mucosa scraping. *European journal of  
55 clinical microbiology & infectious diseases : official publication of the European Society of Clinical Microbiology*.  
56 2018;37(10):1863-7.
- 57 49. van Beers SM, Izumi S, Madjid B, Maeda Y, Day R, Klatser PR. An epidemiological study of leprosy infection by  
58 serology and polymerase chain reaction. *International journal of leprosy and other mycobacterial diseases : official organ of  
59 the International Leprosy Association*. 1994;62(1):1-9.



*M. leprae* genotypes in Bangladesh

- 1 50. Romero-Montoya M, Beltran-Alzate JC, Cardona-Castro N. Evaluation and Monitoring of *Mycobacterium leprae*  
2 Transmission in Household Contacts of Patients with Hansen's Disease in Colombia. *PLoS neglected tropical diseases*.  
3 2017;11(1):e0005325.
- 4 51. van Hooij A, Tjon Kon Fat EM, van den Eeden SJF, Wilson L, Batista da Silva M, Salgado CG, et al. Field-  
5 friendly serological tests for determination of *M. leprae*-specific antibodies. *Scientific reports*. 2017;7(1):8868.
- 6 52. Penna ML, Penna GO, Iglesias PC, Natal S, Rodrigues LC. Anti-PGL-1 Positivity as a Risk Marker for the  
7 Development of Leprosy among Contacts of Leprosy Cases: Systematic Review and Meta-analysis. *PLoS neglected tropical*  
8 *diseases*. 2016;10(5):e0004703.
- 9 53. Barbieri RR, Manta FSN, Moreira SJM, Sales AM, Nery JAC, Nascimento LPR, et al. Quantitative polymerase  
10 chain reaction in paucibacillary leprosy diagnosis: A follow-up study. *PLoS neglected tropical diseases*.  
11 2019;13(3):e0007147.
- 12 54. van Hooij A, van den Eeden S, Richardus R, Tjon Kon Fat E, Wilson L, Franken K, et al. Application of new host  
13 biomarker profiles in quantitative point-of-care tests facilitates leprosy diagnosis in the field. *EBioMedicine*. 2019;47:301-8.
- 14 55. Spencer JS, Brennan PJ. The role of *Mycobacterium leprae* phenolic glycolipid I (PGL-I) in serodiagnosis and in  
15 the pathogenesis of leprosy. *Leprosy review*. 2011;82(4):344-57.
- 16 56. A guide for surveillance of antimicrobial resistance in leprosy. New Delhi: World Health Organization, Region  
17 Office for South-East Asia; 2017.
- 18 57. Avanzi C, Lecorché E, Rakotomalala FA, Benjak A, Rabenja FR, Ramarozatovo LS, et al. Population genomics of  
19 *Mycobacterium leprae* reveals a new genotype in Madagascar and Comoros. *Frontiers in microbiology*. Accepted for  
20 publication.
- 21 58. Geluk A, Duthie MS, Spencer JS. Postgenomic *Mycobacterium leprae* antigens for cellular and serological  
22 diagnosis of *M. leprae* exposure, infection and leprosy disease. *Leprosy review*. 2011;82(4):402-21.
- 23 59. Richardus RA, van der Zwet K, van Hooij A, Wilson L, Oskam L, Faber R, et al. Longitudinal assessment of anti-  
24 PGL-I serology in contacts of leprosy patients in Bangladesh. *PLoS neglected tropical diseases*. 2017;11(12):e0006083.
- 25 60. Manta FSN, Barbieri RR, Moreira SJM, Santos PTS, Nery JAC, Duppre NC, et al. Quantitative PCR for leprosy  
26 diagnosis and monitoring in household contacts: A follow-up study, 2011-2018. *Scientific reports*. 2019;9(1):16675.
- 27 61. Uaska Sartori PV, Penna GO, Bühner-Sékula S, Pontes MAA, Gonçalves HS, Cruz R, et al. Human Genetic  
28 Susceptibility of Leprosy Recurrence. *Scientific reports*. 2020;10(1):1284-.
- 29 62. Uplekar S, Heym B, Friocourt V, Rougemont J, Cole ST. Comparative genomics of *Esx* genes from clinical  
30 isolates of *Mycobacterium tuberculosis* provides evidence for gene conversion and epitope variation. *Infect Immun*.  
31 2011;79(10):4042-9.
- 32 63. Geluk A, van Meijgaarden KE, Franken KLMLC, Subronto YW, Wieles B, Arend SM, et al. Identification and  
33 characterization of the ESAT-6 homologue of *Mycobacterium leprae* and T-cell cross-reactivity with *Mycobacterium*  
34 *tuberculosis*. *Infect Immun*. 2002;70(5):2544-8.
- 35 64. Geluk A, van Meijgaarden KE, Franken KLMLC, Wieles B, Arend SM, Faber WR, et al. Immunological  
36 crossreactivity of the *Mycobacterium leprae* CFP-10 with its homologue in *Mycobacterium tuberculosis*. *Scand J Immunol*.  
37 2004;59(1):66-70.
- 38 65. Cambau E, Saunderson P, Matsuoka M, Cole ST, Kai M, Suffys P, et al. Antimicrobial resistance in leprosy:  
39 results of the first prospective open survey conducted by a WHO surveillance network for the period 2009-15. *Clin*  
40 *Microbiol Infect*. 2018;24(12):1305-10.
- 41 66. Machado D, Lecorche E, Mougari F, Cambau E, Viveiros M. Insights on *Mycobacterium leprae* Efflux Pumps and  
42 Their Implications in Drug Resistance and Virulence. *Frontiers in microbiology*. 2018;9:3072.
- 43 67. Mieras LF, Taal AT, van Brakel WH, Cambau E, Saunderson PR, Smith WCS, et al. An enhanced regimen as  
44 post-exposure chemoprophylaxis for leprosy: PEP+. *BMC infectious diseases*. 2018;18(1):506.
- 45 68. Barth-Jaeggi T, Steinmann P, Mieras L, van Brakel W, Richardus JH, Tiwari A, et al. Leprosy Post-Exposure  
46 Prophylaxis (LPEP) programme: study protocol for evaluating the feasibility and impact on case detection rates of contact  
47 tracing and single dose rifampicin. *BMJ Open*. 2016;6(11):e013633.
- 48 69. Fontes ANB, Lima L, Mota RMS, Almeida RLF, Pontes MA, Goncalves HS, et al. Genotyping of *Mycobacterium*  
49 *leprae* for better understanding of leprosy transmission in Fortaleza, Northeastern Brazil. *PLoS neglected tropical diseases*.  
50 2017;11(12):e0006117.
- 51 70. Lima L, Fontes ANB, Li W, Suffys PN, Vissa VD, Mota RMS, et al. Inpatient comparison of *Mycobacterium*  
52 *leprae* by VNTR analysis in nasal secretions and skin biopsy in a Brazilian leprosy endemic region. *Leprosy review*.  
53 2016;87(4):486-500.
- 54 71. van Hooij A, Tjon Kon Fat EM, Batista da Silva M, Carvalho Bouth R, Cunha Messias AC, Gobbo AR, et al.  
55 Evaluation of Immunodiagnostic Tests for Leprosy in Brazil, China and Ethiopia. *Scientific reports*. 2018;8(1):17920.
- 56 72. Martinez AN, Lahiri R, Pittman TL, Scollard D, Truman R, Moraes MO, et al. Molecular determination of  
57 *Mycobacterium leprae* viability by use of real-time PCR. *Journal of clinical microbiology*. 2009;47(7):2124-30.
- 58 73. Koboldt DC, Zhang Q, Larson DE, Shen D, McLellan MD, Lin L, et al. VarScan 2: somatic mutation and copy  
59 number alteration discovery in cancer by exome sequencing. *Genome research*. 2012;22(3):568-76.

*M. leprae* genotypes in Bangladesh

- 1 74. Rimmer A, Phan H, Mathieson I, Iqbal Z, Twigg SRF, Wilkie AOM, et al. Integrating mapping-, assembly- and
- 2 haplotype-based approaches for calling variants in clinical sequencing applications. *Nature genetics*. 2014;46(8):912-8.
- 3 75. Robinson JT, Thorvaldsdóttir H, Winckler W, Guttman M, Lander ES, Getz G, et al. Integrative genomics viewer.
- 4 *Nat Biotechnol*. 2011;29(1):24-6.
- 5

## 1 **Tables**

2 **Table 1. *M. leprae* genotypes identified in Bangladesh.**

| Genotype        | Number of individual | %    |
|-----------------|----------------------|------|
| 1A              | 9                    | 31.0 |
| 1B-Bangladesh   | 4                    | 13.8 |
| 1D              | 13                   | 44.8 |
| 1D- <i>esxA</i> | 3                    | 10.4 |
| 1*              | 3                    |      |

3 *M. leprae* genotypes identified in patients and contacts from Bangladesh and the percentage of each  
4 subtype are shown. *M. leprae* DNA was isolated from slit skin smears (SSS) and/or nasal swabs (NS).  
5 Genotypes were determined by Whole Genome Sequencing (WGS) or Sanger sequencing according to  
6 Monot et al. (3, 22). The new subtype 1B-Bangladesh was identified by WGS and primers were then  
7 designed for use in Sanger sequencing (Table S5). 1D-*esxA* is 1D subtype containing an A at  
8 SNP61425 in the *esxA* gene, traditionally grouped as 1C (3, 22). This SNP is also found in strains from  
9 the genotype 3I and 2E (Figure 2, green). 1\* are samples with genotype 1 for which the subtype could  
10 not be determined due to DNA concentration limit.

*M. leprae* genotypes in Bangladesh

1 **Table 2. Intraindividual *M. leprae* genomic differences.**

| Samples            | Mutation             | Gene          | % reads |    | Aligned   |          |
|--------------------|----------------------|---------------|---------|----|-----------|----------|
|                    |                      |               | SSS     | NS | reads SSS | reads NS |
| <b>RB073-RN084</b> | T1824441C; Gly56Asp  | <i>ml1512</i> |         |    | 13%       | 32       |
| <b>RB053-RN022</b> | G1823127A; Ser494Leu | <i>ml1512</i> |         |    | 28%       | 115      |
|                    | 1823614_1823615insC  | <i>ml1512</i> |         |    | 8.5%      | 59       |
| <b>RB074-RN095</b> | G1823098A; Leu504Phe | <i>ml1512</i> | 91%     |    |           | 158      |
|                    | G660474C; Val252Leu  | <i>metK</i>   | 100%    |    |           | 196      |
|                    | C2116695A; Pro100Thr | <i>ml1750</i> |         |    | 60%       | 40       |
|                    | A2116670G; Gln108Arg | <i>ml1750</i> |         |    | 23%       | 40       |
|                    | G2116695A; Arg168His | <i>ml1750</i> |         |    | 26%       | 27       |
| <b>RB069-RN165</b> | C9231T; Leu34Phe     | <i>glpQ</i>   |         |    | 25%       | 257      |
|                    | C2121552T; Val226Ile | <i>ml1752</i> |         |    | 16%       | 307      |

2 Genomic differences between *M. leprae* genomes obtained from slit skin smears (SSS) and nasal swabs  
3 (NS) of the same MB patient. Percentage of mutated reads and total number of reads aligned at the  
4 position of the mutation. No differences were found between the SSS and NS genomes of two patients:  
5 RB001-RN001 and RB048-RN059.

1 **Table 3. Anti-PGL-I IgM positivity.**

| Genotype                           | Number of positive individual | % of positivity |
|------------------------------------|-------------------------------|-----------------|
| MB patients BI 2-6 (n=33)          | 33                            | 100.0           |
| Patients BI 0 (n=27)               | 9                             | 33.3            |
| Healthy household contacts (n=250) | 92                            | 36.8            |

2 Anti-PGL-I antibody levels were measured by up-converting reporter particles lateral flow assay  
3 specific for *M. leprae* PGL-I IgM antibodies (UCP-LFA) using the Ratio (R) of the Test (T) and flow  
4 control (FC) lines as units. Ratios of  $\geq 0.10$  were considered positive.

## 1 **Figure captions**

2 **Figure 1. Study design, RLEP positivity and genotyped samples.** Flow diagram providing an  
3 overview of the subjects recruited for this study. Slit skin smears (SSS) and nasal swabs (NS) collected  
4 per group; healthy household contacts (HHC), paucibacillary (PB) or multibacillary (MB) patients with  
5 BI 0, and MB patients with a bacillary index (BI) 2-6. MB patients with BI 1 were not diagnosed  
6 within the course of this study. DNA was isolated from SSS and NS and screened for *M. leprae* DNA  
7 by RLEP PCR. Samples were genotyped by Sanger sequencing (3, 22) or Whole Genome Sequencing  
8 (29). Percentages of the samples positive for RLEP PCR and genotyped are shown.

9  
10 **Figure 2. Phylogeography of *M. leprae* strains.** Maximum parsimony tree of 259 genomes of *M.*  
11 *leprae* built in MEGA 7. Support values were obtained by bootstrapping 500 replicates. Branch lengths  
12 are proportional to nucleotide substitutions. The tree is rooted using *M. lepromatosis*. The strains from  
13 Bangladesh are shown in red and their exact organization in the tree is shown in the two zoomed  
14 sections of the genotypes 1A-B and 1D. Strains with an A at SNP61425 in the *esxA* gene are shown in  
15 green. The specific 1B-Bangladesh genotype/cluster of Bangladesh strains is shown in blue.

16  
17 **Figure 3. Distribution of *M. leprae* genotypes in Bangladesh.** Map of Bangladesh including markers  
18 indicating the residence of every subject with at least one sample genotyped for *M. leprae* (A), and  
19 zoomed into the area of interest (B). Each marker indicates an individual for whom *M. leprae* genotype  
20 was determined, either from slit skin smear, nasal swab or both samples. Genotype 1A is shown in  
21 green, 1B-Bangladesh in orange, 1D in blue, 1D-*esxA* in purple and 1\* in white. 1D-*esxA* is 1D subtype  
22 containing an A at SNP61425 in the *esxA* gene, formerly grouped as 1C (3, 22). 1\* are samples with  
23 genotype 1 for which the subtype could not be determined. The figure was drawn in R (v3.4.3) with the  
24 package *leaflet* (v2.0.2) using maps available from Esri – National Geographic.

25

*M. leprae* genotypes in Bangladesh

1 **Figure 4. Correlation of IgM antibodies against PGL-I to Ct of RLEP qPCR.** Quantified levels of  
2 pathogen DNA (qPCR) and host immunity were correlated for samples selected for qPCR analysis  
3 based on RLEP positivity in multiple individuals in one household. Each dot represents a sample from  
4 one individual; leprosy patients are indicated in black, and healthy household contact in blue. Anti-  
5 PGL-I antibody levels were measured by up-converting reporter particles lateral flow assay specific for  
6 *M. leprae* PGL-I IgM antibodies ( $\alpha$ PGL-I UCP-LFA) using the Ratio (R) of the Test (T) and flow  
7 control (FC) lines as units. Ratios of  $\geq 0.10$  were considered positive as indicated by the red dashed  
8 line. RLEP cycle threshold (Ct) values are indicated on the x-axis and were measured by qPCR to  
9 detect *M. leprae* DNA in slit skin smears (SSS, left) and nasal swabs (NS, left). Undetermined Cts are  
10 depicted as Ct 40.

1 **Supporting information captions**

2 **Table S1. Cohort characterization.**

3 **Table S2. WGS results.**

4 **Table S3. *M. leprae* strain-specific SNPs.**

5 **Table S4. PCR primers for *M. leprae* strain-specific SNPs.**

6 **Table S5. Primers and probes used in the study.**

7 **Figure S1. Samples analysed by whole genome sequencing.**

8

9 **Supplementary Data 1. Overall subject and sample information, PCR, quantitative PCR (qPCR),**  
10 **genotyping and antimicrobial resistance results.**

11

12 **Supplementary Data 2. SNPs identified in 259 *M. leprae* genomes, including 27 genomes from this**  
13 **study.**



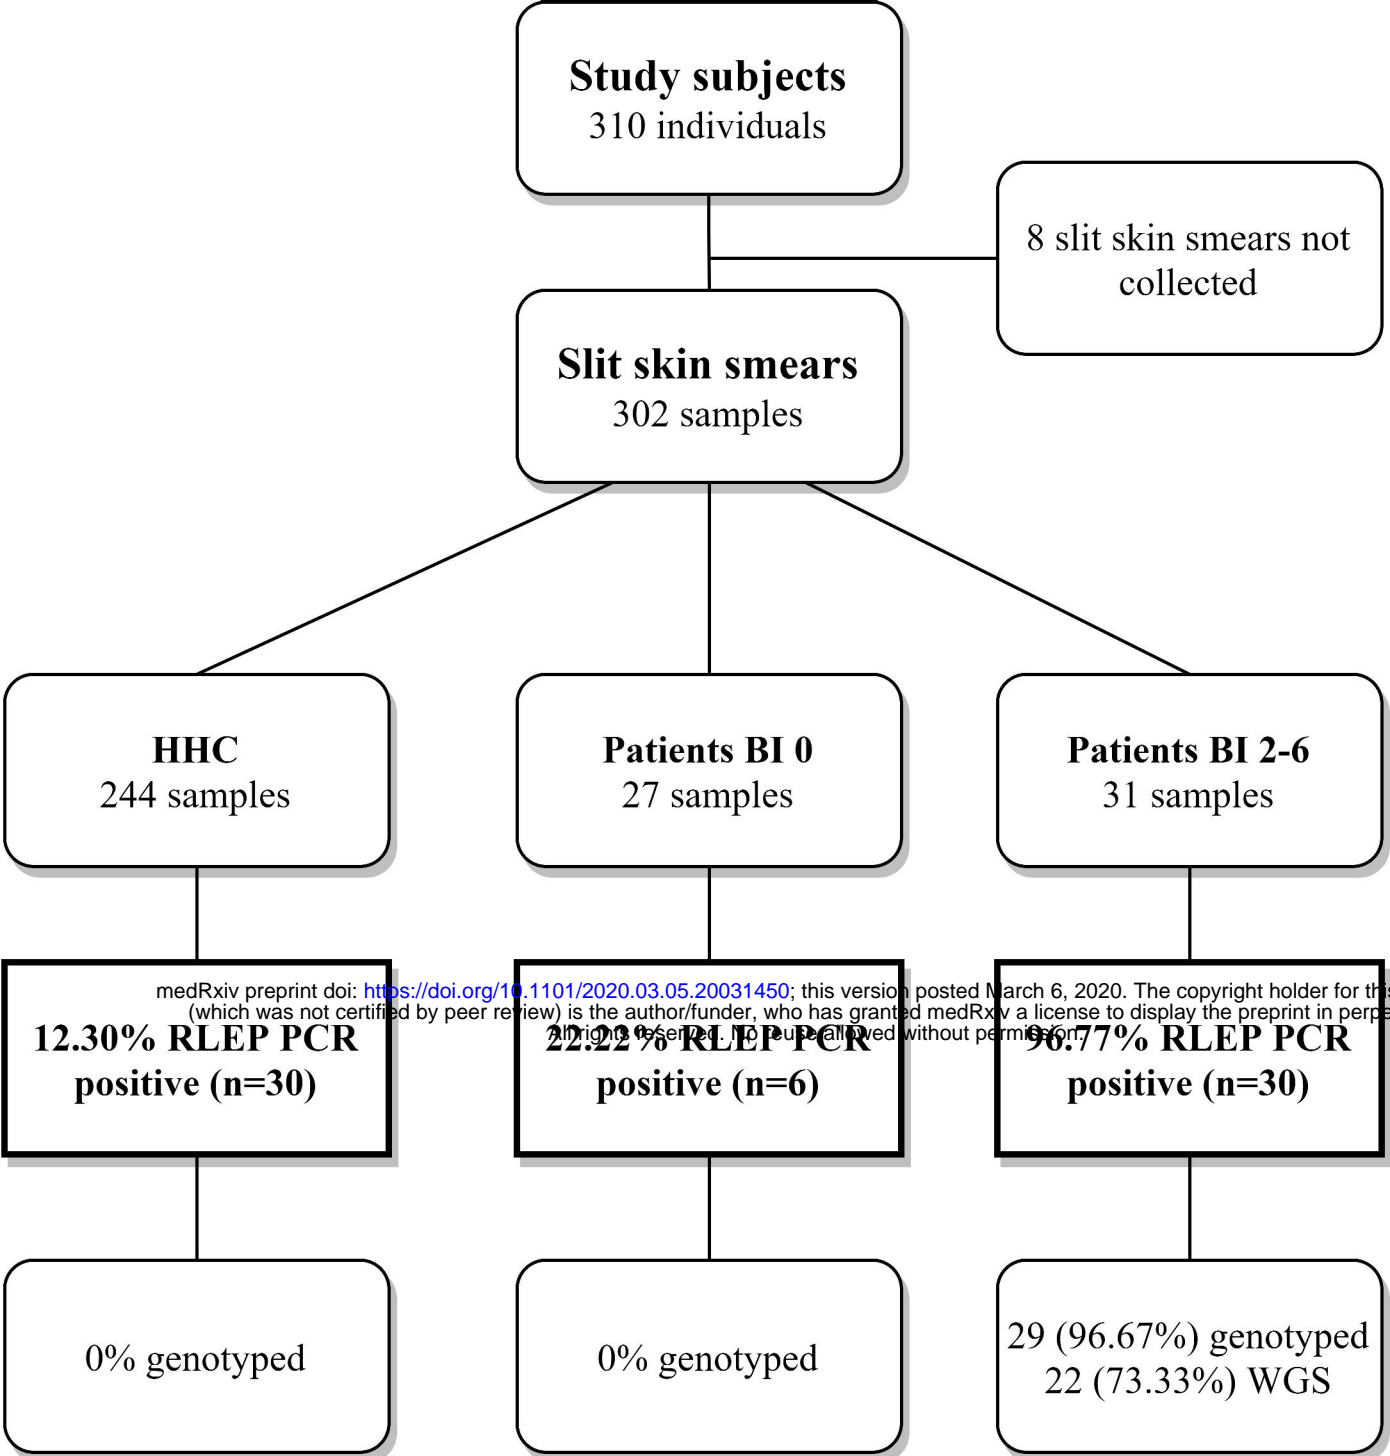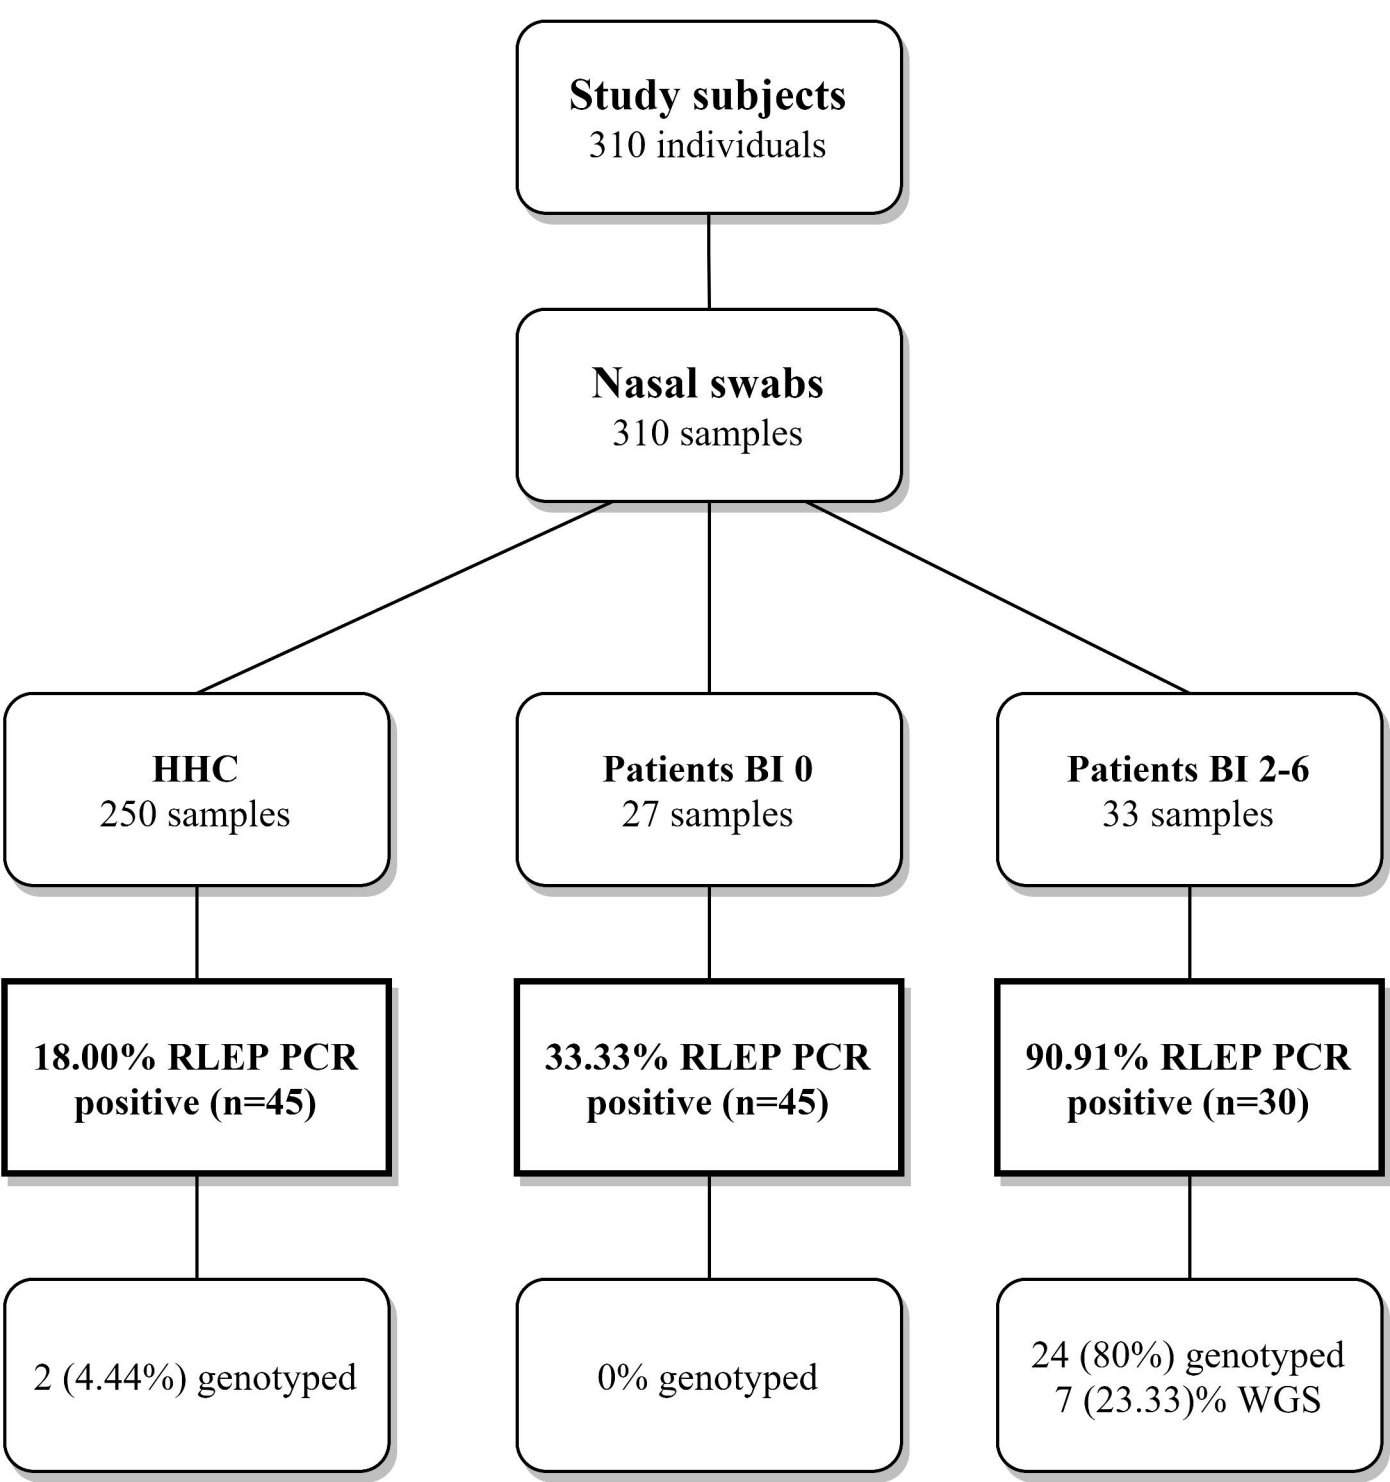

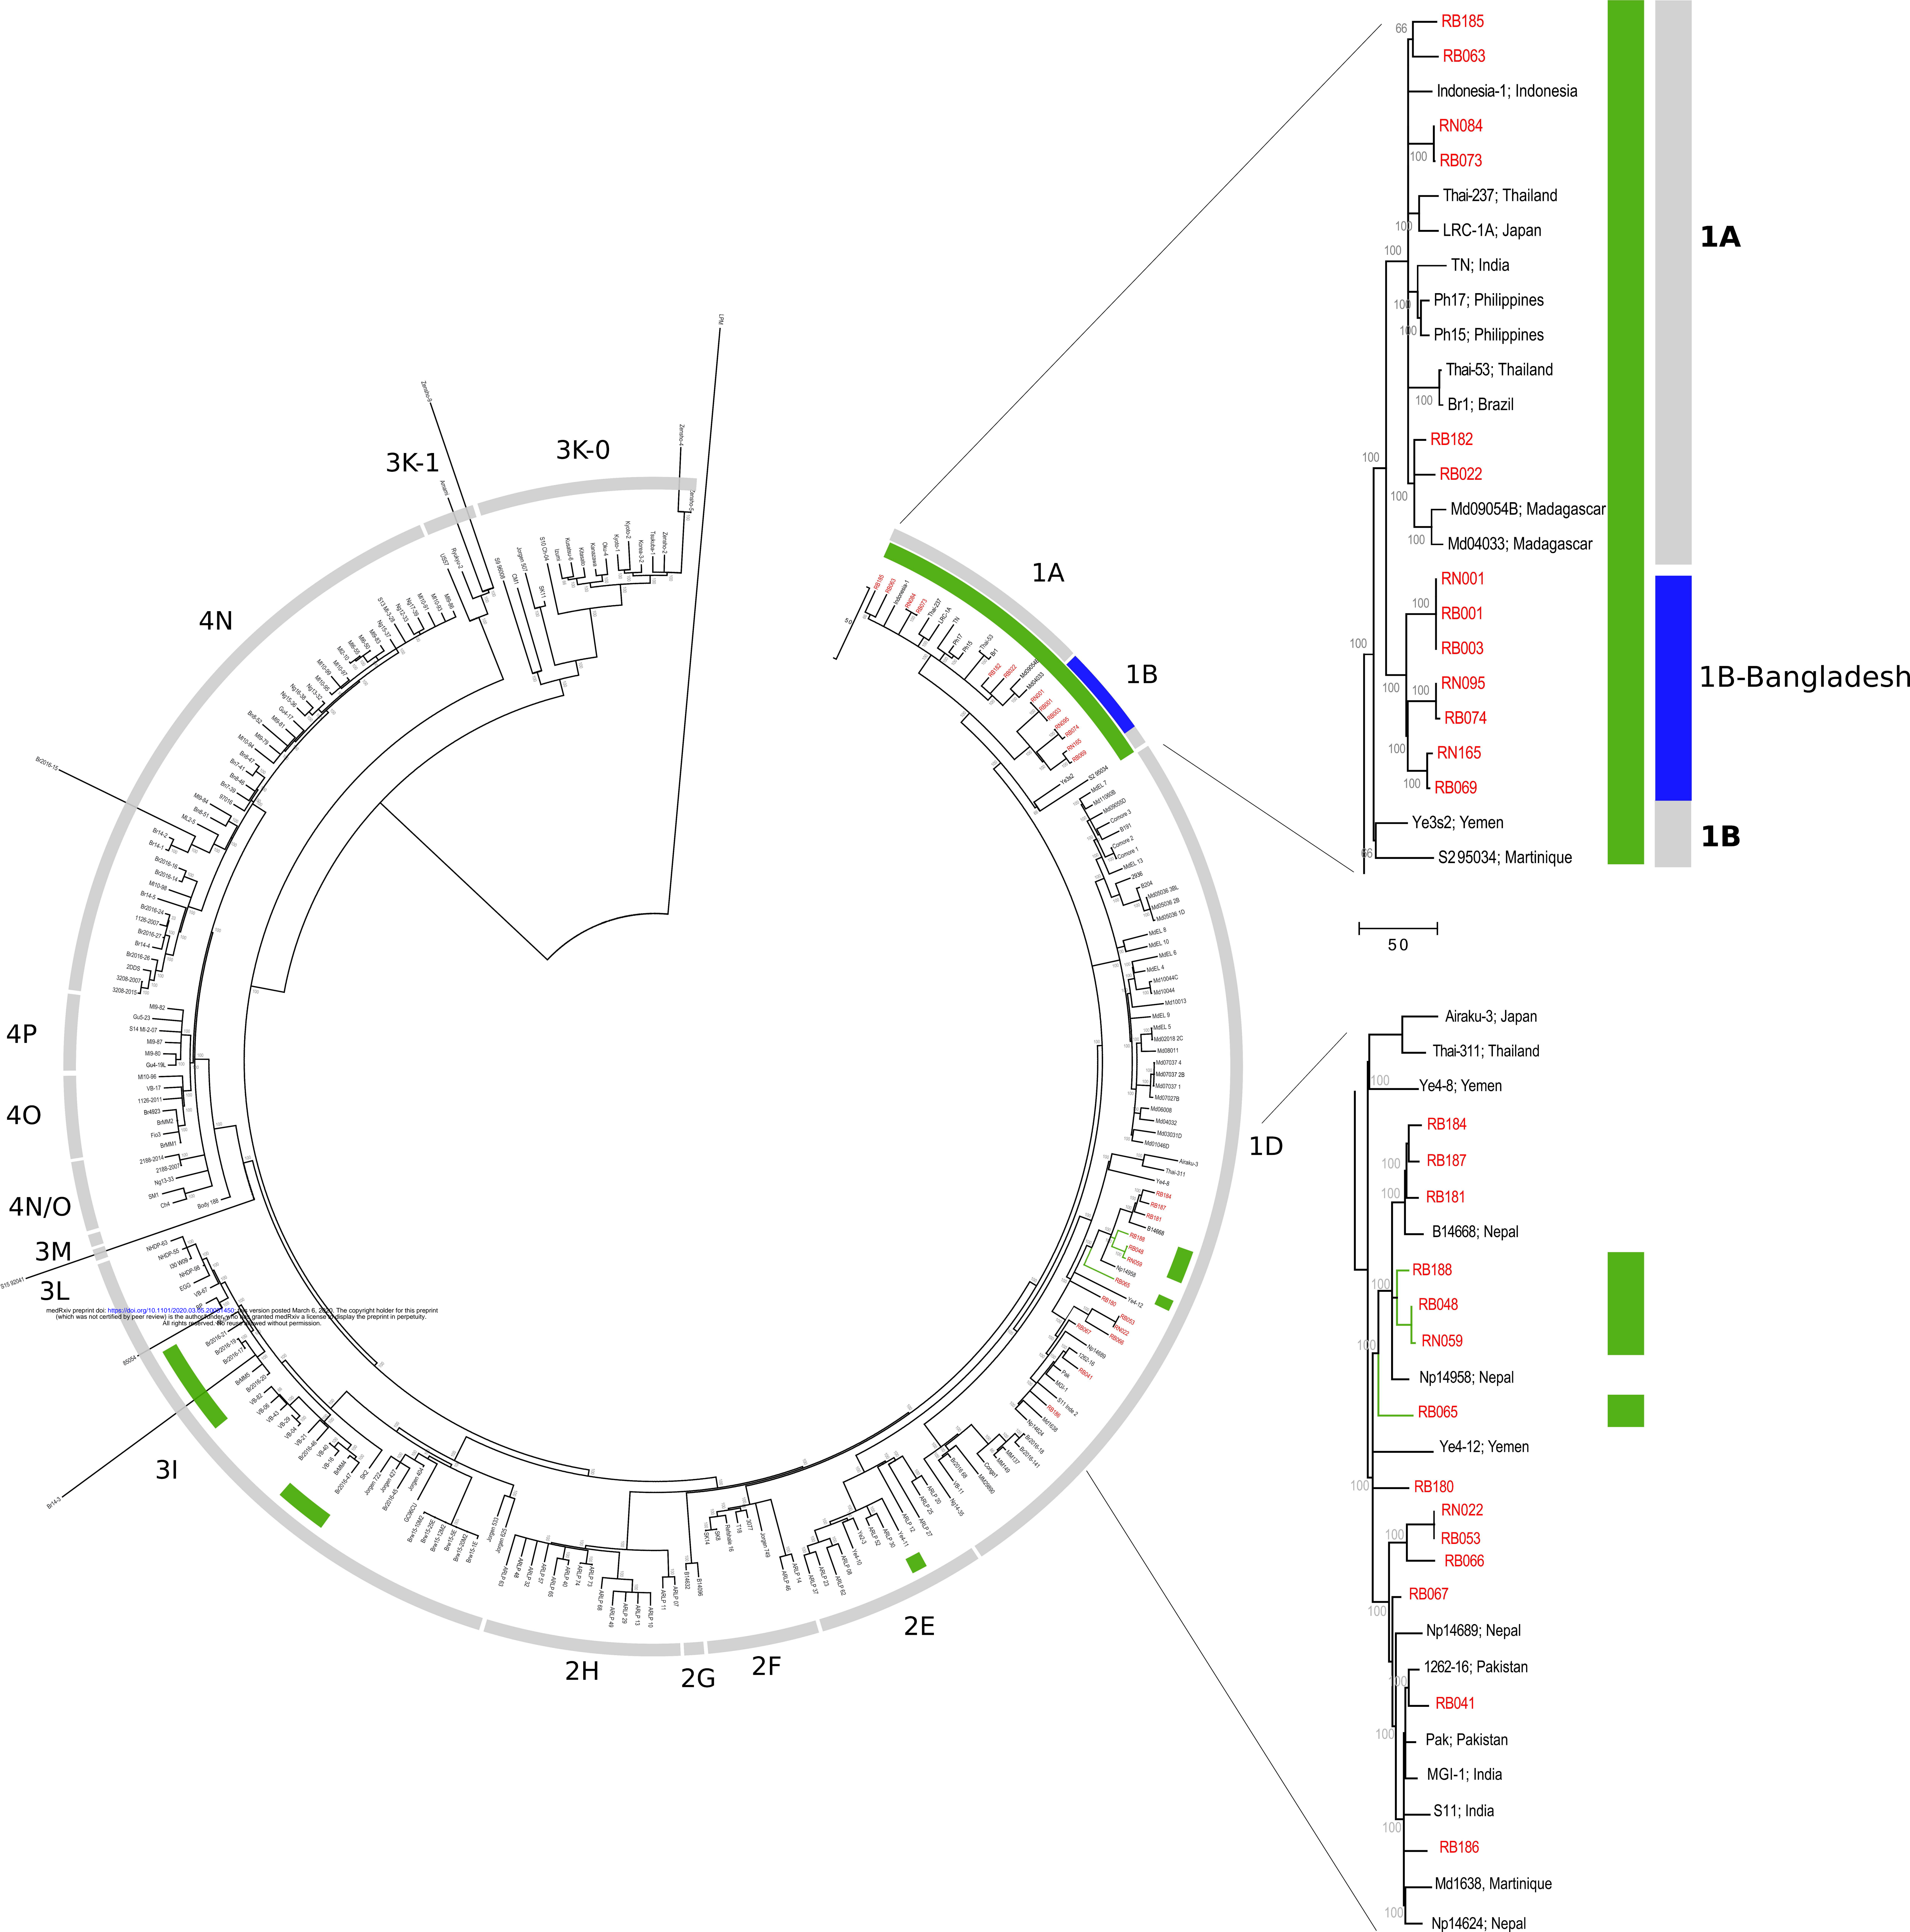

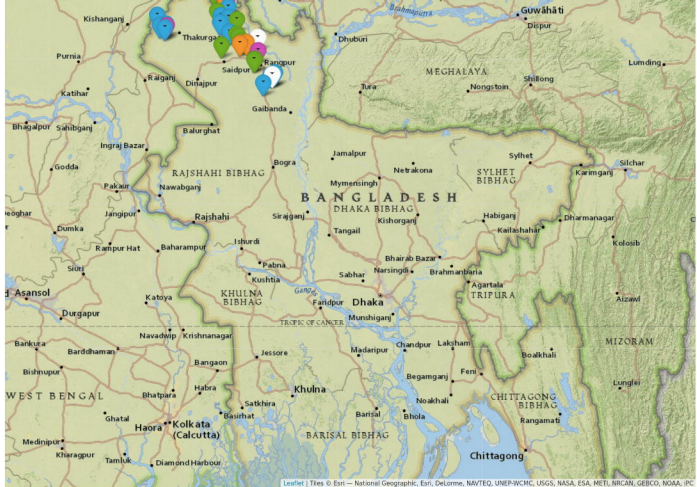

**B**

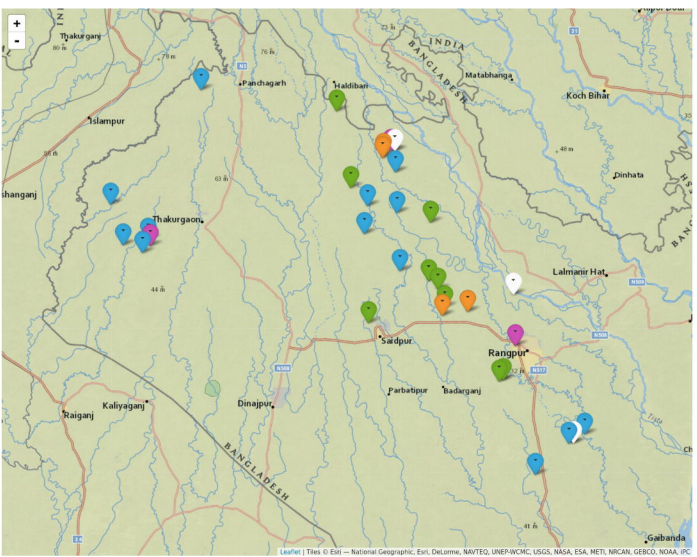

### SSS RLEP qPCR

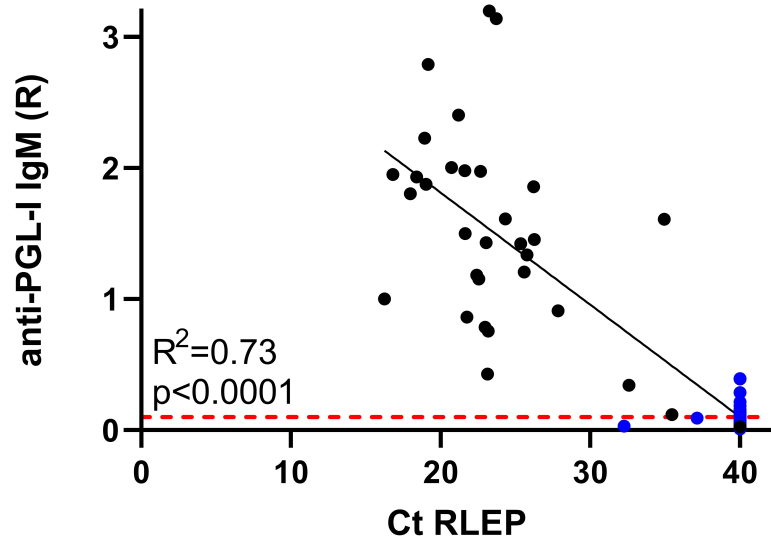

### NS RLEP qPCR

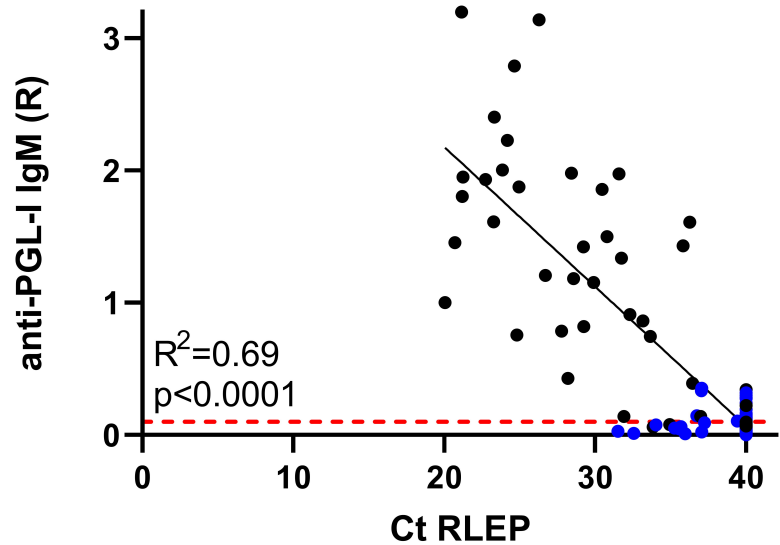

Source: https://www.medrxiv.org/content/10.1101/2020.03.05.20031450v1.full.pdf
